# Supplementary material for: Long-Term Outcomes of Liver Transplantation for the Management of Neuroendocrine Neoplasms: A Systematic Review
Source: MDPI journal article supplement (doi:10.3390/jpm13101428), 2023-09-23
Supplement: s1 [file s1]

| Checklist criterion                                                                                            | Routley, et al.                                                                                                                               | Rosenau, et al.                                                                   | Florman, et al.                                         | van Vilsteren, et al.     | Marin, et al.                                     |
|----------------------------------------------------------------------------------------------------------------|-----------------------------------------------------------------------------------------------------------------------------------------------|-----------------------------------------------------------------------------------|---------------------------------------------------------|---------------------------|---------------------------------------------------|
| Is the hypothesis/aim/objective of the study stated clearly in the abstract, introduction, or methods section? | Yes<br><br>Describes aim to present centre's experience                                                                                       | Yes<br><br>Clear description of aims (survival and role of prognostic indicators) | Yes<br><br>Clearly described                            | Yes                       | Yes                                               |
| Are the characteristics of the participants included in the study described?                                   | Yes<br>Adequate description of sex, age, hormonal status, stage and status                                                                    | Yes                                                                               | Yes                                                     | Yes                       | No                                                |
| Were the cases collected in more than one centre?                                                              | No<br>Single centre study (Kings College London)                                                                                              | No<br>Single centre study                                                         | No<br>Single centre study                               | No<br>Single centre study | No<br>Single centre study                         |
| Are the eligibility criteria (inclusion and exclusion) for entry explicit and appropriate?                     | No<br>Generic, poorly described selection criteria. Palliative only.                                                                          | No<br>All patients included, but indications not well described/detailed          | No<br>Almost good, but uncertainty around resectability | Yes                       | No                                                |
| Were participants recruited consecutively?                                                                     | Yes                                                                                                                                           | Yes                                                                               | Yes                                                     | Yes                       | Yes                                               |
| Did participants enter the study at a similar point in the disease?                                            | No<br>Appear to all be palliative intent, but at different disease stages (i.e. metastases and non-distant metastases; different indications) | No<br>Mixture of localised, nodal, and distantly metastatic disease               | No                                                      | Yes                       | Yes<br><br>(all had metastases)                   |
| Was the intervention clearly described in the study?                                                           | No<br>(minimal to no information on approach, post-op management, selection)                                                                  | No<br>(minimal detail on selection; standard orthotopic technique stated)         | Yes                                                     | Yes                       | No<br>(minimal detail on procedure and selection) |
| Were additional interventions (co-interventions) clearly reported in the study?                                | Yes                                                                                                                                           | Yes<br>Excellently described at patient level                                     | Yes                                                     | Yes                       | No<br>(Minimal data provided)                     |
| Are the outcome measures clearly defined in the introduction or methods section?                               | No<br>(No methods section; intro states generic 'outcomes')                                                                                   | Yes                                                                               | No                                                      | Yes                       | No                                                |
| Were relevant outcomes appropriately measured with objective and/or subjective methods?                        | Yes<br>(outcomes studied were relevant, but not exhaustive)                                                                                   | Yes                                                                               | Yes                                                     | Yes                       | Yes                                               |
| Were outcomes measured before and after intervention?                                                          | Not appropriate<br>(post-surgical outcomes)                                                                                                   | Not appropriate                                                                   | Not appropriate                                         | Not appropriate           | Not appropriate                                   |

|                                                                                                       |                                                |           |           |           |          |
|-------------------------------------------------------------------------------------------------------|------------------------------------------------|-----------|-----------|-----------|----------|
| Were the statistical tests used to assess the relevant outcomes appropriate?                          | Yes                                            | Yes       | Yes       | Yes       | Unclear  |
| Was the length of follow-up reported?                                                                 | Yes<br>(Albeit, by group, rather than overall) | Yes       | Yes       | Yes       | Yes      |
| Was the loss to follow-up reported?                                                                   | Yes                                            | Yes       | Yes       | Yes       | Yes      |
| Does the study provide estimates of the random variability in the data analysis of relevant outcomes? | No                                             | No        | No        | No        | No       |
| Are adverse events reported?                                                                          | Yes                                            | Yes       | Yes       | Yes       | Yes      |
| Are the conclusions of the study supported by results?                                                | Yes                                            | Yes       | Yes       | Yes       | Yes      |
| Are both competing interests and sources of support for the study reported?                           | No                                             | No        | No        | No        | No       |
| <b>Total score</b>                                                                                    | <b>10</b>                                      | <b>11</b> | <b>11</b> | <b>14</b> | <b>9</b> |

| Checklist criterion                                                                                            | Olausson, et al.                                                    | Dhupar, et al.                | Frilling, et al.                                                     | Bonaccorsi-Riani, et al.       | Le Treut, et al.        |
|----------------------------------------------------------------------------------------------------------------|---------------------------------------------------------------------|-------------------------------|----------------------------------------------------------------------|--------------------------------|-------------------------|
| Is the hypothesis/aim/objective of the study stated clearly in the abstract, introduction, or methods section? | Yes                                                                 | Yes                           | Yes                                                                  | Yes                            | Yes                     |
| Are the characteristics of the participants included in the study described?                                   | Yes                                                                 | Yes                           | No<br>(Yes overall, but not specifically for the transplant sub-set) | Yes                            | Yes                     |
| Were the cases collected in more than one centre?                                                              | No                                                                  | No                            | No                                                                   | No                             | Yes                     |
| Are the eligibility criteria (inclusion and exclusion) for entry explicit and appropriate?                     | Yes                                                                 | Yes                           | Yes                                                                  | Yes                            | Yes                     |
| Were participants recruited consecutively?                                                                     | Yes                                                                 | Yes                           | Yes                                                                  | Yes                            | Yes                     |
| Did participants enter the study at a similar point in the disease?                                            | Yes<br>(All metastatic stage)                                       | Yes<br>(All metastatic stage) | Yes<br>(All distant metastases, i.e. liver)                          | Yes<br>(All metastatic stages) | Yes<br>(All metastatic) |
| Was the intervention clearly described in the study?                                                           | Yes<br>(Excellent detail on pre-transplant, and procedural aspects) | No                            | Yes                                                                  | Yes                            | Yes                     |

|                                                                                                                |                 |                                            |                              |                                                |                                                                                                                                                     |
|----------------------------------------------------------------------------------------------------------------|-----------------|--------------------------------------------|------------------------------|------------------------------------------------|-----------------------------------------------------------------------------------------------------------------------------------------------------|
| Were additional interventions (co-interventions) clearly reported in the study?                                | Yes             | No<br>(not specifically for the NET group) | No                           | Yes<br>(pre-transplant trajectory is detailed) | Yes                                                                                                                                                 |
| Are the outcome measures clearly defined in the introduction or methods section?                               | Yes             | Yes                                        | Yes                          | No                                             | Yes                                                                                                                                                 |
| Were relevant outcomes appropriately measured with objective and/or subjective methods?                        | Yes             | Yes                                        | Yes                          | Yes                                            | Yes                                                                                                                                                 |
| Were outcomes measured before and after intervention?                                                          | Not appropriate | Not appropriate                            | Not appropriate              | Not appropriate                                | Not appropriate                                                                                                                                     |
| Were the statistical tests used to assess the relevant outcomes appropriate?                                   | Yes             | Yes                                        | Yes                          | Yes                                            | Yes<br>(For outcomes; double selection of prognostic factors occurred, i.e. univariate screen then backwards elimination I multivariable Cox model) |
| Was the length of follow-up reported?                                                                          | Yes             | Yes                                        | Yes                          | Yes                                            | Yes                                                                                                                                                 |
| Was the loss to follow-up reported?                                                                            | Yes             | Yes                                        | Yes                          | Yes                                            | Yes                                                                                                                                                 |
| Does the study provide estimates of the random variability in the data analysis of relevant outcomes?          | No              | No                                         | No                           | No                                             | No                                                                                                                                                  |
| Are adverse events reported?                                                                                   | Yes             | Yes                                        | No                           | Yes                                            | Yes                                                                                                                                                 |
| Are the conclusions of the study supported by results?                                                         | Yes             | Yes                                        | Yes                          | Yes                                            | Yes                                                                                                                                                 |
| Are both competing interests and sources of support for the study reported?                                    | Yes             | Yes                                        | Yes                          | No                                             | Yes                                                                                                                                                 |
| <b>Total score</b>                                                                                             | <b>15</b>       | <b>13</b>                                  | <b>12</b>                    | <b>13</b>                                      | <b>16</b>                                                                                                                                           |
|                                                                                                                |                 |                                            |                              |                                                |                                                                                                                                                     |
| Checklist criterion                                                                                            | Sher, et al.    | Mazzaferro, et al.                         | Korda, et al.                | Valvi, et al.                                  | Sposito, et al.                                                                                                                                     |
| Is the hypothesis/aim/objective of the study stated clearly in the abstract, introduction, or methods section? | Yes             | Yes                                        | Yes                          | Yes                                            | Yes                                                                                                                                                 |
| Are the characteristics of the participants included in the study described?                                   | Yes             | Yes                                        | No<br>(Limited descriptives) | Yes                                            | Yes                                                                                                                                                 |

|                                                                                                       |                                                                            |                                                                                                                                            |                        |                                                                                                            |                                                                                   |
|-------------------------------------------------------------------------------------------------------|----------------------------------------------------------------------------|--------------------------------------------------------------------------------------------------------------------------------------------|------------------------|------------------------------------------------------------------------------------------------------------|-----------------------------------------------------------------------------------|
| Were the cases collected in more than one centre?                                                     | Yes                                                                        | No                                                                                                                                         | No                     | Yes                                                                                                        | No                                                                                |
| Are the eligibility criteria (inclusion and exclusion) for entry explicit and appropriate?            | No<br>(Multicentre, no clear data on OLT selection criteria)               | Yes<br>(Rare case where explicit selection criteria detailed)                                                                              | No<br>(Limited detail) | No<br>(Multicentre registry [UNOS], no uniform selection criteria or discussion of differences in centres) | Yes                                                                               |
| Were participants recruited consecutively?                                                            | No                                                                         | Yes                                                                                                                                        | Yes                    | Yes                                                                                                        | Yes                                                                               |
| Did participants enter the study at a similar point in the disease?                                   | Yes<br>(All metastatic)                                                    | Yes                                                                                                                                        | Yes/uncertain          | Yes                                                                                                        | Yes<br>(All post-liver transplant recurrence)                                     |
| Was the intervention clearly described in the study?                                                  | No<br>(Variability in centres assumed; no unified 'approach' to selection) | Yes                                                                                                                                        | No                     | Yes                                                                                                        | Yes                                                                               |
| Were additional interventions (co-interventions) clearly reported in the study?                       | No                                                                         | Yes                                                                                                                                        | Yes                    | No                                                                                                         | Yes                                                                               |
| Are the outcome measures clearly defined in the introduction or methods section?                      | Yes                                                                        | Yes                                                                                                                                        | Yes                    | Yes                                                                                                        | Yes                                                                               |
| Were relevant outcomes appropriately measured with objective and/or subjective methods?               | Yes                                                                        | Yes                                                                                                                                        | Yes                    | Yes                                                                                                        | Yes                                                                               |
| Were outcomes measured before and after intervention?                                                 | Not appropriate                                                            | Not appropriate                                                                                                                            | Not appropriate        | Not appropriate                                                                                            | Not appropriate                                                                   |
| Were the statistical tests used to assess the relevant outcomes appropriate?                          | Yes                                                                        | Yes                                                                                                                                        | Yes                    | Yes                                                                                                        | Yes                                                                               |
| Was the length of follow-up reported?                                                                 | Yes                                                                        | Yes                                                                                                                                        | Yes                    | No                                                                                                         | Yes<br>(Median follow-up after recurrence was the key aspect, reported at 73.7mo) |
| Was the loss to follow-up reported?                                                                   | Yes                                                                        | Yes                                                                                                                                        | Yes                    | No                                                                                                         | Yes                                                                               |
| Does the study provide estimates of the random variability in the data analysis of relevant outcomes? | No                                                                         | Yes<br>(Accounted for optimism in data analysis when compiling propensity score model using bootstrap and optimism correction; Monte-Carlo | No                     | No                                                                                                         | No                                                                                |

|                                                                             |           |                                      |           |           |           |
|-----------------------------------------------------------------------------|-----------|--------------------------------------|-----------|-----------|-----------|
|                                                                             |           | approaches to confidence intervals). |           |           |           |
| Are adverse events reported?                                                | Yes       | Yes                                  | Yes       | No        | No        |
| Are the conclusions of the study supported by results?                      | Yes       | Yes                                  | Yes       | Yes       | Yes       |
| Are both competing interests and sources of support for the study reported? | Yes       | Yes                                  | Yes       | Yes       | Yes       |
| <b>Total score</b>                                                          | <b>12</b> | <b>16</b>                            | <b>12</b> | <b>11</b> | <b>14</b> |
