# Supplementary material for: Long-Term Outcomes of Liver Transplantation for the Management of Neuroendocrine Neoplasms: A Systematic Review
Source: MDPI journal article supplement (doi:10.3390/jpm13101428), 2023-09-23
Supplement: s1 [file s1]

PubMed: "neuroendocrine"[Title/Abstract] AND "liver" AND "transplant\*"

Scopus: TITLE-ABS-KEY ( "neuroendocrine" AND "liver" AND "transplant\*" )

EMBASE:

1. neuroendocrine tumor/ or neuroendocrine tumo\*.mp or carcinoid/
2. liver transplantation.mp. or liver transplantation/
3. liver transplant.mp. or liver graft/
4. hepatic transplantation.mp.
5. liver metastasiss/ or liver metastas\*.mp.
6. 2 or 3 or 4
7. 1 and 6
8. limit 8 to human
